# Supplementary material
Source: PubMed Central journal article supplement (PMC6052220)
Supplement: supp_RA117.001387_134559_1_supp_134147_p8f9dp.pdf [file supp_RA117.001387_134559_1_supp_134147_p8f9dp.pdf]

**Supplemental Table 1: Primers used in this study for analyzing the human gene expression**

| <b>Primer name</b> | <b>Primer sequences</b> |
|--------------------|-------------------------|
| $\beta$ -actin-F   | CCGTTCCGAAAGTTGCCTTTT   |
| $\beta$ -actin-R   | ATCATCCATGGTGAGCTGGC    |
| Mcl-1-F            | CGACTTTTGGCCACCGGC      |
| Mcl-1-R            | CAACCCGTCGTAAGGTCTCC    |
| Bcl2-F             | CAACATCGCCCTGTGGATGA    |
| Bcl2-R             | GGGCCAAACTGAGCAGAGTC    |
| Socs3-F            | ATTCGGGACCAGCCCCC       |
| Socs3-R            | AAACTTGCTGTGGGTGACCA    |
| c-Myc-F            | TAGTGGAAAACCAGCCTCCC    |
| c-Myc-R            | CCGAGTCGTAGTCGAGGTCA    |
